# Supplementary material for: Chemical epitaxy of CdSe on GaAs
Source: Royal Society of Chemistry journal article supplement (doi:10.1039/c7ce01137g), 2017-01-01
Supplement: c7ce01137g1.pdf [file c7ce01137g1.pdf]

## Electronic Supplementary Information

### Chemical Epitaxy of CdSe on GaAs

Ofir Friedman, Dor Korn, Vladimir Ezersky and Yuval Golan\*

*Department of Materials Engineering and Ilse Katz Institute for Nanoscale Science and Technology, Ben-Gurion University of the Negev, Be'er-Sheva 8410501, Israel  
 E-mail: ygolan@bgu.ac.il*

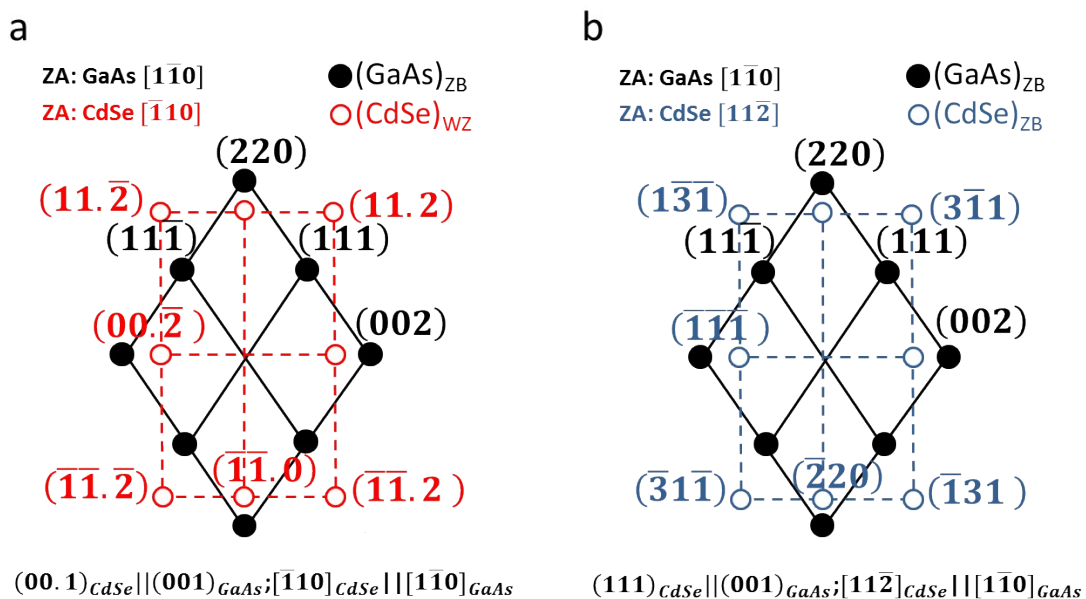

**Fig. S1** ED pattern from a TEM cross-section specimen of a CdSe thin film chemically deposited on GaAs(100). The patterns represent GaAs in orientation of  $(001);[\bar{1}\bar{1}0]$ , alongside CdSe that can be solved in two different manners: (a) Indexing corresponding to hexagonal CdSe in orientation of  $(00.1);[\bar{1}\bar{1}0]$ , (b) Indexing corresponding to cubic CdSe in orientation of  $(111);[11\bar{2}]$ .

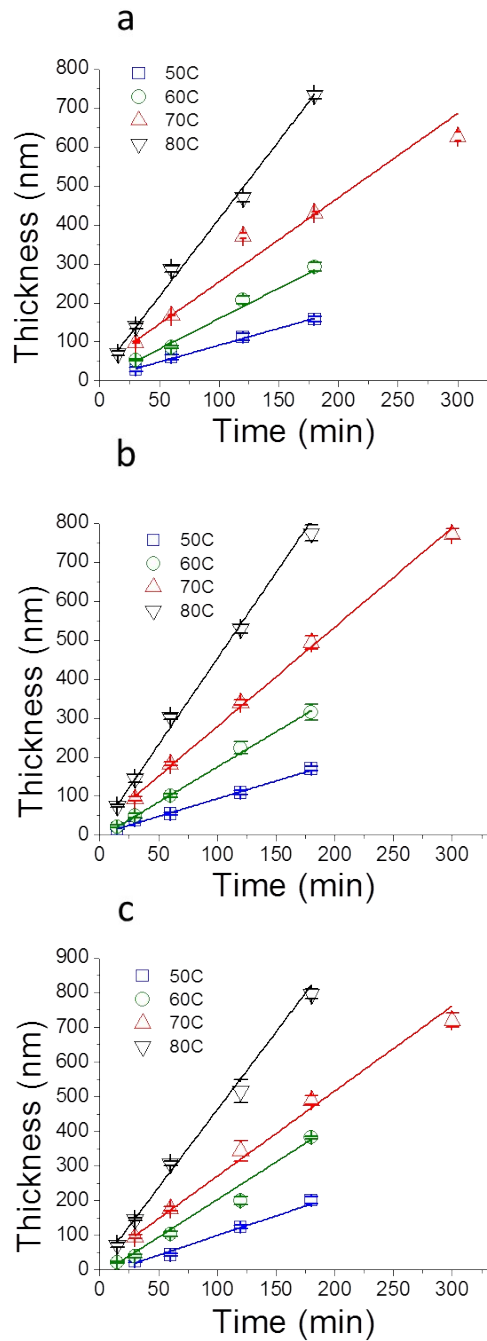

**Fig. S2** Determination of growth rate: Thickness obtained from cross section HR-SEM micrographs as a function of time at a temperature range of 50-80°C. .  $R^2$  ranged from 0.966 to 0.997. (a) CdSe on GaAs(100). (b) CdSe on GaAs(111)A. (c) CdSe on GaAs(111)B.

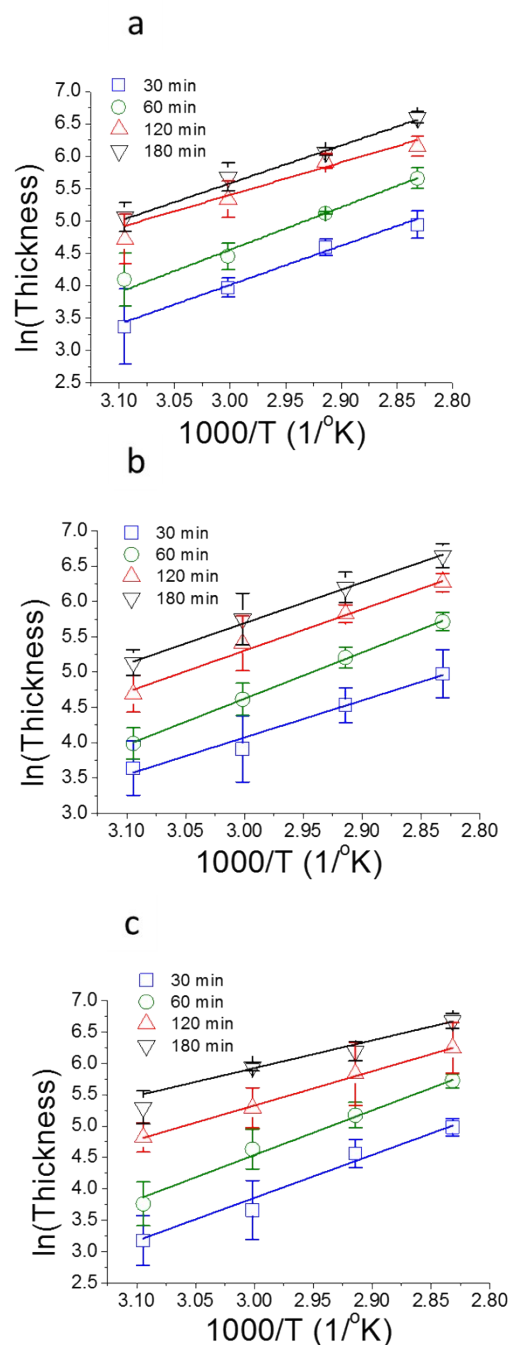

**Fig. S3** Arrhenius plots for deposition time range of 30-180 min.  $R^2$  ranged from 0.884 to 0.998 (a) CdSe deposited on GaAs(100). (b) CdSe deposited on GaAs(111)A. (c) CdSe deposited on GaAs(111)B.
